# Supplementary material for: Mutation screening of the USH2A gene reveals two novel pathogenic variants in Chinese patients causing simplex usher syndrome 2
Source: BMC Ophthalmol. 2020 Feb 24;20:70. doi: 10.1186/s12886-020-01342-y (PMC7038606; doi:10.1186/s12886-020-01342-y)
Supplement: Supplementary file 1 — Additional file 1: Table S1. Primer information for the USH2A gene exons 2 to 72 sequencing. (XLS 31 kb) [file 12886_2020_1342_MOESM1_ESM.xls]

## Sheet: Sheet1
Table S1. Primer information for the USH2A gene exons 2 to 72 sequencing.
Exon	Forward sequence (5′-3′)	Reverse sequence (5′-3′)	Tm (°C)	Amplicon Length (bp)
2	CTCTGAGAACGTGTCTGCAG	CAGGCTGAAATGATCTTCACTAC	58	660
3	CTGTAACTGCACAATACCTTAGC	ACTGCTGCAGATTTTGTGAG	57	298
4	CACATGGAGATATCACTGAGCT	CCCTAGAAGATGAATACACGTAGAT	57	356
5	GTCCTACAGTGTCCATGGAG	GCATTTATCCTTTCGGTTC	57	283
6	CGAGTGACATTCATTTGTAACGA	GGCATTTGTTGCAATAACCA	60	394
7	CAGGGCTATGAAGTTTCTGG	CACCAGCCTAGAGAGCTAGC	57	383
8	GGCTTTCTATGATAATCCTGTATTG	GCTCTGACATCTTAATGTGCTG	58	426
9	CACAGTTGAGTTGGTGTTCCT	TGCCATGCTATCCAAACAC	58	428
10	CTTCTGGTGAAAGGCCTAAC	GAAGCACACAGGCCTCC	57	288
11	GTCATAATGCATAACCTTTCCC	GCACACGAACAACCATCTC	59	268
12	CTCCCTCCCTGTCTTGTACC	CCAGATGGTAATAGAGATGTGACTG	58	282
13	GCAGTAGCATTGTTTGTGTCTC	GTAGAAGCCACAAACCAGAAAC	57	772
14	GGGAATTAGTGCCTTGGTAGAG	GAAGTTATTGCTTTGCAACTGC	59	335
15	GGCTAAAACAAGCCGTCTTACTC	CTGTATGATGCTGCTTCACACAC	61	276
16	GACCTCTTTGCTGGATATCTTACTT	CAACAGCATTTATCCTCAATGTC	58	285
17	CCCTTGGTGGTAGTTTACTGAC	CACTTGTTCCACTAACCAGGAC	58	1026
18	CTTTAACTGACCTGTCCCTACC	GGAGCAAGATGAGACATGTG	57	650
19	CTGCATTGGATTGGCTCAA	AAATGTCCAAATGAAGCCCTAAG	59	613
20	GGTGGTTGGCAATAATTCC	CAGCTGTAACTCGTAGCTCCTAG	58	423
21	CCACAACTGATTTGATTTGAAG	TGGAGCTTCGTGTCTCCTA	57	355
22	CCATGCGAGTATATTGCTGTG	GAAGCATTTACCTCAGTACCAGG	59	296
23	GAAAGCCAGAATGATGCTAGAC	CACCAACATATCAACAGGGC	59	307
24	CAGGCAATGAGGAGAGAGG	CCTAAAGGAAATTTTTGGCAC	58	331
25	GCTATCATTTACTATAGCTGATGGTG	GAGGTCAAGTTAATCAAACAGGAG	58	396
26	GCACCCTTACAATGCTGGC	CCCCAATTAAGTGTAATGCCAAC	60	247
27	GCTTTCAGGGAACTGTTTTG	GGGAAGCACCTCAGTTACC	57	735
28,29	GACTCAAGCCCTTTATGCG	GCTTCAGGGTAATAGTCCTTCC	58	505
30	GAGTCTGATTTACTGCGGCC	GGCTTCCACTACTTTAGATGGG	59	401
31	TCCTTCCATTCAACAATCAGCA	GAGCAATTATGGCCTGGCAA	58	402
32	ATTACTGACAAGCTGCCCAC	CCTGGATATCGAGAGCCAA	57	349
33	TCACAGACGTTCAAGAAAACAGT	GCTCCTCCCCTGATTGAAC	59	458
34	GGCATTGGATAACTACTTCAGTG	GAAAGAAAAGATGGACCACG	57	372
35	GGGACCAAGAGTGAAATGAG	CACAATCTCCCCAACTAGAGAC	57	304
36	AGGAGAAATACCAGAGTCTGTGA	TGAGTCACCGCCACTTACT	62	326
37	GAGGTGTGCTTTGATCCTGC	CACATTCTGAGAACCGTCGG	61	457
38	GCCAGGTCAACTCAGATAGC	AGCCAACATTTGCATAGACTTAC	57	368
39	CCATCCAGCATATGTTCTCC	TGCAAATGAGAACTGACCTACTC	59	255
40	GAGATCTCATTTGATGGCAGAA	GGCTCATTTCTTTGCTTTGG	60	331
41	CCAAGAGGTCTGACTTTCTGG	TGCAAAGGAGAGAGAATAGTCAG	58	655
42	GCAAAATTCTAGGCCTCGTG	AAAGCCTCCTTCATTTCCCTAC	60	450
43	CAGAACAGCCTGAGTTTTGG	CGCTCACACAATGAAGACAC	58	252
44	GGTTTATGCTGGCAAGTCACA	CAGCCCTGTCAATCTGCAAT	57	479
45	AACTATCACCACCAGCACCA	ATGACTGATCTCAACCCCG	57	427
46	CTTCATCAGCGAAAAGCAG	CACCATCCTCATCACCATC	57	523
47	AGGGAAGGTGGGATTCAGAC	TGTCATGGCTGAGAGGATACC	57	239
48	CCTCACGCCATGTGTTATTCT	GCTAAAGTGCTCATGAGGGTG	59	529
49	CACAAAGCATGGTTGAAGACTTC	GTTCACTGACATGAACCACGTG	58	421
50	TGAATCCACTCTACGTTCCAA	GTAGACCTGGGCCCCTTAC	57	540
51	CCAAACTTTATAGCAGCCTCAGT	CAATCATAGCGAACTCATTCG	62	414
52	CAAAAGCCTACCCTATGTATGTC	CAGCAGCTTCTCACTAACCC	61	294
53	GTGCAATTCCGTATCCCTG	ACGAGGACTACACCACAAAGTG	57	543
54	GTATTGCATTTCTTCCGAACAC	CCCTTTTCCCAGAGTTTAGGC	57	425
55	GATATGCCAGGCCAGACAA	ACCACAATGACAGACTCCTCC	58	317
56	CAACTCTGCATGTTACTTCTGGT	TTCTTCCCTCAAACCATGG	58	184
57	TCCCAGTAAATGAGGCCAGA	TGCTAGTTCAAGGATGCGTG	58	916
58	GCAGCTGAAATTACAATGGC	TCCAGGAGACCGACTATGTC	58	431
59	CAAACATTTGTTGCCCATTCT	CTTTACTCGATGCCAGACTGTG	58	456
60	CAACGTCTGCATCTCCGTG	GATTCTGCTGTGTTGGAGCAG	58	693
61	GGCCACTGGAGTACTTCTCC	GGTGACAGAATGAGAGCCTG	59	812
62	CTCTGCTGTAGTGTTTGCGC	CAGTGACCTGATGGCATGTC	60	397
63	GTCTCTCTGTGGGCCTTATG	CTGAGAGTAAGGCTGCAGGT	61	1098
63	CATTGCAAGCACCTCCAG	CAATGGTTCCATCCCTCC	58	648
63	CATCAGAAGTCAGCCCTCCA	CAATAGAAAGGTCAGCAGTGGC	60	758
64	GCTCTAGCTGCAAAGGTAGGAGT	GTGCCTTTTCAAATTGTGCAC	60	868
65	GGGTATCTTGCTTTTGACAGTC	GTTCACCGTAGAGCAACTGAG	60	340
66	CTGCCTTTATCTAGCCTTCCTTC	CCTAGGTGCAGAGTAGGCTATACC	61	311
67	GAGCCTGTAGCTCTGTGAAAAC	TGGTAGCAGCCACTTATACTCAC	61	304
68	CACACCTGCACTCCTTCAA	GTGAGCATCTGCTGGTCAG	58	293
69	CGTCATAACTTGCTTTGGAATCC	GATGAATAGGTGCTACGCCAAGT	58	200
70	CTTTCTGCTTTCAACTCCTCTC	CTTGGTCCCCACACTTAGTG	57	446
71	GTCAGGAGACAGTCATTCCCT	GAAGTACAGGCAGCTCTGTACC	59	364
72	CAAGGTCTGTTTTAGACCCCAC	GGTTACGTCTTCTGGGTTTCC	60	223
